# Supplementary material for: Oral anticoagulants, time in therapeutic range and renal function over time in real-life patients with atrial fibrillation and chronic kidney disease
Source: PubMed Central journal article supplement (PMC9476150; doi:10.1136/openhrt-2022-002043), 2022-09-14

## Supplementary material

Oral anticoagulants, time in therapeutic range, and renal function over time  
in real-life patients with atrial fibrillation and chronic kidney disease

Gorav Batra (MD, PhD), Angelo Modica (MD, PhD),  
Henrik Renlund (MSc), Anders Larsson (MD, PhD),  
Christina Christersson (MD, PhD), Claes Held (MD, PhD)

**Supplementary Table S1.** The International Code of Disease, tenth revision (ICD-10) and the Anatomical Therapeutic Chemical (ATC) codes applied to identify comorbidities and comedication

| Variable                                     | Data source              | ICD-10 / ATC code                                                                                                                                                                                                                                                                                           |
|----------------------------------------------|--------------------------|-------------------------------------------------------------------------------------------------------------------------------------------------------------------------------------------------------------------------------------------------------------------------------------------------------------|
| Age                                          | Auricula                 | -                                                                                                                                                                                                                                                                                                           |
| Sex                                          | Auricula                 | -                                                                                                                                                                                                                                                                                                           |
| Hypertension                                 | NPR                      | I10, I11, I12, I13, I15                                                                                                                                                                                                                                                                                     |
| Diabetes mellitus                            | NPR                      | E10, E11, E12, E13, E14                                                                                                                                                                                                                                                                                     |
| Prior stroke                                 | NPR                      | I60, I61, I63, I64                                                                                                                                                                                                                                                                                          |
| Prior TIA                                    | NPR                      | G45                                                                                                                                                                                                                                                                                                         |
| Prior systemic embolism                      | NPR                      | I74                                                                                                                                                                                                                                                                                                         |
| Prior MI                                     | NPR                      | I21, I22, I23, I252                                                                                                                                                                                                                                                                                         |
| Prior PCI or CABG                            | NPR                      | Z951, Z955                                                                                                                                                                                                                                                                                                  |
| Heart failure                                | NPR                      | I42, I50, I110, I255, I130, I132, K761                                                                                                                                                                                                                                                                      |
| Peripheral vascular disease                  | NPR                      | I70, I71, I72, I73                                                                                                                                                                                                                                                                                          |
| COPD                                         | NPR                      | J43, J44                                                                                                                                                                                                                                                                                                    |
| Cancer (within 3 years)                      | NPR                      | C                                                                                                                                                                                                                                                                                                           |
| Prior major bleeding                         | NPR                      | I60, I61, I62, S064, S065, S066, K226, K250, K252, K254, K256, K260, K262, K264, K266, K270, K272, K274, K276, K280, K282, K284, K286, K290, K625, K661, K920, K921, K922, I850, I983, N02, R319, N939, N950, N501A, H113, H313, H356, H431, H450, H922, I312, J942, M250, R04, R58, T810, D500, D629, T792 |
| CHA <sub>2</sub> DS <sub>2</sub> -VASc score | Auricula, NPR            | 1 point each for: heart failure, hypertension, age 65- 74 years, diabetes, vascular disease, female sex; 2 points each for 75 years, thromboembolism.                                                                                                                                                       |
| Creatinine/eGFR                              | Auricula                 | -                                                                                                                                                                                                                                                                                                           |
| INR                                          | Auricula                 | -                                                                                                                                                                                                                                                                                                           |
| Warfarin                                     | Auricula                 | -                                                                                                                                                                                                                                                                                                           |
| DOAC                                         | Auricula                 | -                                                                                                                                                                                                                                                                                                           |
| Dabigatran etexilate                         | Auricula                 | -                                                                                                                                                                                                                                                                                                           |
| Rivaroxaban                                  | Auricula                 | -                                                                                                                                                                                                                                                                                                           |
| Apixaban                                     | Auricula                 | -                                                                                                                                                                                                                                                                                                           |
| Edoxaban                                     | Auricula                 | -                                                                                                                                                                                                                                                                                                           |
| Other OAC                                    | Auricula                 | -                                                                                                                                                                                                                                                                                                           |
| Acetylsalicylic acid                         | Prescribed Drug Register | B01AC06                                                                                                                                                                                                                                                                                                     |
| P2Y <sub>12</sub> inhibitor                  | Prescribed Drug Register | B01AC04, B01AC05, B01AC22, B01AC24                                                                                                                                                                                                                                                                          |

eGFR levels are based on the Chronic Kidney Disease Epidemiology Collaboration (CKD-EPI) equation.

Abbreviations: CABG, coronary artery bypass grafting; COPD, chronic obstructive pulmonary disease; DOAC, direct oral anticoagulants; eGFR, estimated glomerular filtration rate; INR, international normalised ratio; MI, myocardial infarction; NPR, National Patient Register; OAC, oral anticoagulants; PCI, percutaneous coronary intervention; TIA, transient ischaemic attack; TTR, time in therapeutic range.

**Supplementary Figure S1.** Consort diagram illustrating inclusion and exclusion of patients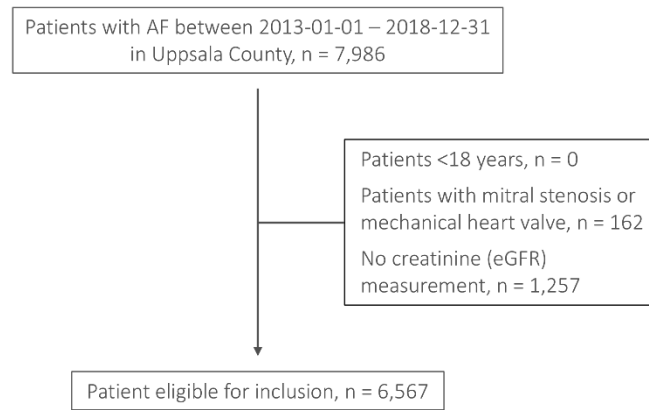

**Supplementary Table S2.** CKD stage at baseline (columns) and at end of follow-up (rows)

| <b>Baseline/<br/>End follow-up</b> | <b>eGFR ≥90<br/>(n = 364)</b> | <b>eGFR 60-89<br/>(n = 2,384)</b> | <b>eGFR 30-59<br/>(n =1,197)</b> | <b>eGFR 15-29<br/>(n = 94)</b> | <b>eGFR &lt;15/<br/>dialysis<br/>(n = 16)</b> |
|------------------------------------|-------------------------------|-----------------------------------|----------------------------------|--------------------------------|-----------------------------------------------|
| <b>eGFR ≥90</b>                    | 201 (55.2)                    | 87 (3.7)                          | 2 (0.2)                          | 0 (0.0)                        | 0 (0.0)                                       |
| <b>eGFR 60-89</b>                  | 152 (41.8)                    | 1712 (71.8)                       | 175 (14.6)                       | 3 (3.2)                        | 0 (0.0)                                       |
| <b>eGFR 30-59</b>                  | 11 (3.0)                      | 561 (23.5)                        | 881 (73.6)                       | 24 (25.5)                      | 4 (25.0)                                      |
| <b>eGFR 15-29</b>                  | 0 (0.0)                       | 21 (0.9)                          | 132 (11.0)                       | 48 (51.1)                      | 3 (18.8)                                      |
| <b>eGFR &lt;15/dialysis</b>        | 0 (0.0)                       | 3 (0.1)                           | 7 (0.6)                          | 19 (20.2)                      | 9 (56.3)                                      |

eGFR levels are based on the Chronic Kidney Disease Epidemiology Collaboration (CKD-EPI) equation.

Abbreviations: eGFR, estimated glomerular filtration rate

**Supplementary Figure S2.** Median change in eGFR over time in patients treated with (A) warfarin and (B) DOAC

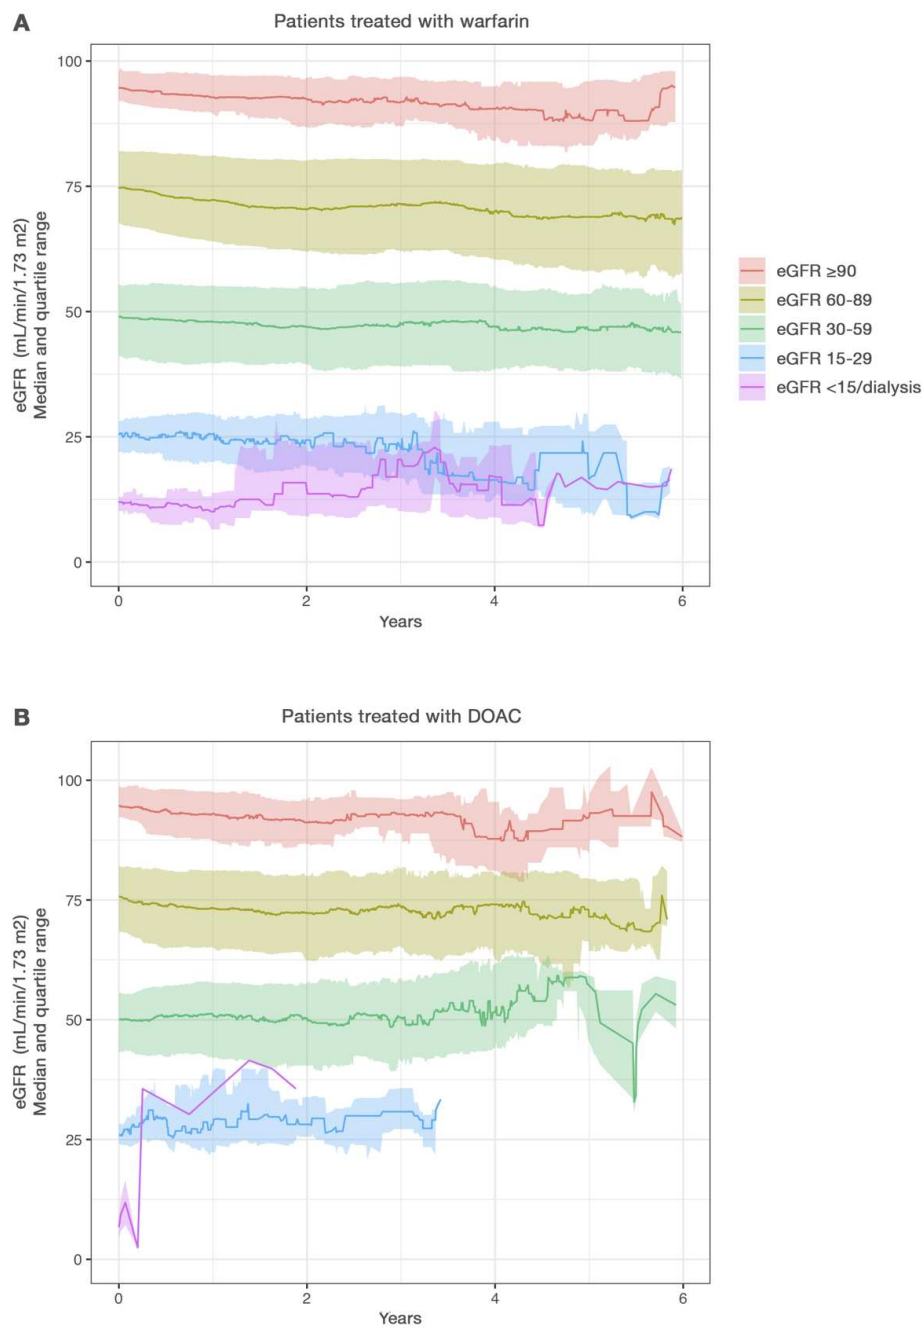

Supplement: openhrt-2022-002043supp001.pdf [file openhrt-2022-002043supp001.pdf]
